# Supplementary material for: Work-function tuneable and aqueous solution-processed Cs2CO3 for high-performance polymer solar cells
Source: Royal Society of Chemistry journal article supplement (doi:10.1039/c4ta01441c), 2014-01-01

## Work-Function Tuneable and Aqueous Solution-Processed $\text{Cs}_2\text{CO}_3$ for High-Performance Polymer Solar Cells

Mei-Feng Xu,<sup>a</sup> Ying-Jie Liao,<sup>b</sup> Feng-Shuo Zu,<sup>a</sup> Jian Liang,<sup>a</sup> Da-Xing Yuan,<sup>a</sup> Zhao-Kui Wang,<sup>\*a</sup> and Liang-Sheng Liao<sup>\*a</sup>

**Table S1**  $J$ - $V$  characteristics of photovoltaic devices using  $\text{Cs}_2\text{CO}_3$  cathode buffer layers from the solutions with different  $\text{Cs}_2\text{CO}_3$  concentrations and 5.0 mg/ml  $\text{Cs}_2\text{CO}_3$  with and without doped with 10%  $\text{MoO}_3$  and  $\text{Na}_2\text{WO}_4$  aqueous solutions.

| Buffer layer                                                      | $V_{oc}$ (V) | $J_{sc}$ (mA/cm <sup>2</sup> ) | FF(%) | PCE(%) |
|-------------------------------------------------------------------|--------------|--------------------------------|-------|--------|
| Reference                                                         | 0.57         | 12.05                          | 45    | 3.14   |
| 0.1 mg/ml $\text{Cs}_2\text{CO}_3$                                | 0.59         | 12.23                          | 46    | 3.27   |
| 0.1 mg/ml $\text{Cs}_2\text{CO}_3$ :10 % $\text{MoO}_3$           | 0.59         | 12.12                          | 45    | 3.21   |
| 0.1 mg/ml $\text{Cs}_2\text{CO}_3$ :10 % $\text{Na}_2\text{WO}_4$ | 0.60         | 12.15                          | 46    | 3.25   |
| 1.0 mg/ml $\text{Cs}_2\text{CO}_3$                                | 0.61         | 12.53                          | 45    | 3.42   |
| 1.0 mg/ml $\text{Cs}_2\text{CO}_3$ :10 % $\text{MoO}_3$           | 0.62         | 12.54                          | 45    | 3.45   |
| 1.0 mg/ml $\text{Cs}_2\text{CO}_3$ :10 % $\text{Na}_2\text{WO}_4$ | 0.71         | 12.40                          | 46    | 4.01   |
| 5.0 mg/ml $\text{Cs}_2\text{CO}_3$                                | 0.71         | 12.55                          | 50    | 4.43   |
| 5.0 mg/ml $\text{Cs}_2\text{CO}_3$ :10% $\text{MoO}_3$            | 0.76         | 12.35                          | 52    | 4.89   |
| 5.0 mg/ml $\text{Cs}_2\text{CO}_3$ :10% $\text{Na}_2\text{WO}_4$  | 0.81         | 12.49                          | 52    | 5.25   |

**Figure S1** AFM image of the bare ITO substrates.

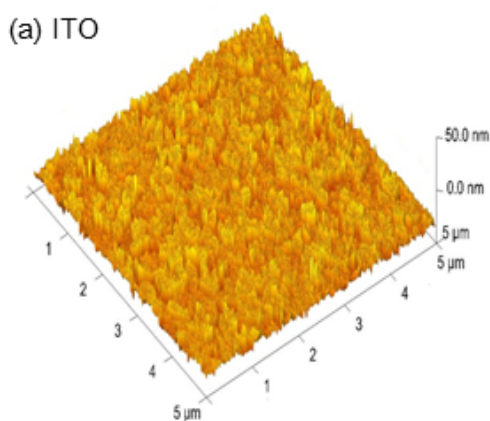

Supplement: c4ta01441c1.pdf [file c4ta01441c1.pdf]
